# Supplementary material
Source: Springer Nature journal article supplement (https://www.springermedizin.de/resource/supplementary/13054_2004_2857_MOESM3_ESM.pdf/9719154)

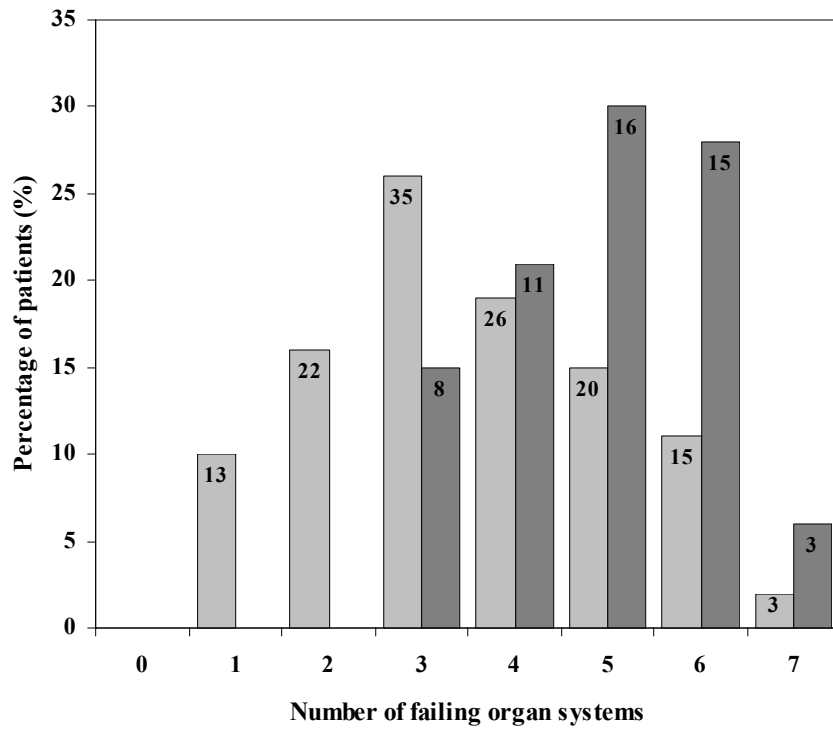

Supplement: MOESM3 [file 9719154]
